# Supplementary material
Source: Springer Nature journal article supplement (https://www.springermedizin.de/resource/supplementary/12911_2009_304_MOESM3_ESM.ZIP/9525492)
Supplement: MOESM3 [file 9525492]

<<description>>  
Reduction cfr. goal RASS  
(Short Protocol)

Reduce dose Dormicum with 10%  
per 4 hours until completely stopped  
(min. reduction of 0,5 ml/4h, rounded  
to 0.1 ml/h)

[Dormicum associated]

[Dormicum not associated]

[Reduction time longer than 4 hours]

[Reduction time shorter than 4 hours]

Reduce Diprivan 2% with 2ml/h

Reduce Ultiva with 0.02  
g/kg/min / 4 hours  
(min dose 0.05 g/kg/min)

Wait 4 hours

[RASS not achieved]

[RASS achieved]

<<structured>>  
Reduce Diprivan by 50% until  
completely stopped  
Reduce Ultiva by 50% until 0.05  
g/kg/min. Stop Ultiva only after  
starting Perfusalgan and  
Tradonal
