# Supplementary material
Source: Springer Nature journal article supplement (https://www.springermedizin.de/resource/supplementary/12911_2009_304_MOESM3_ESM.ZIP/9525492)

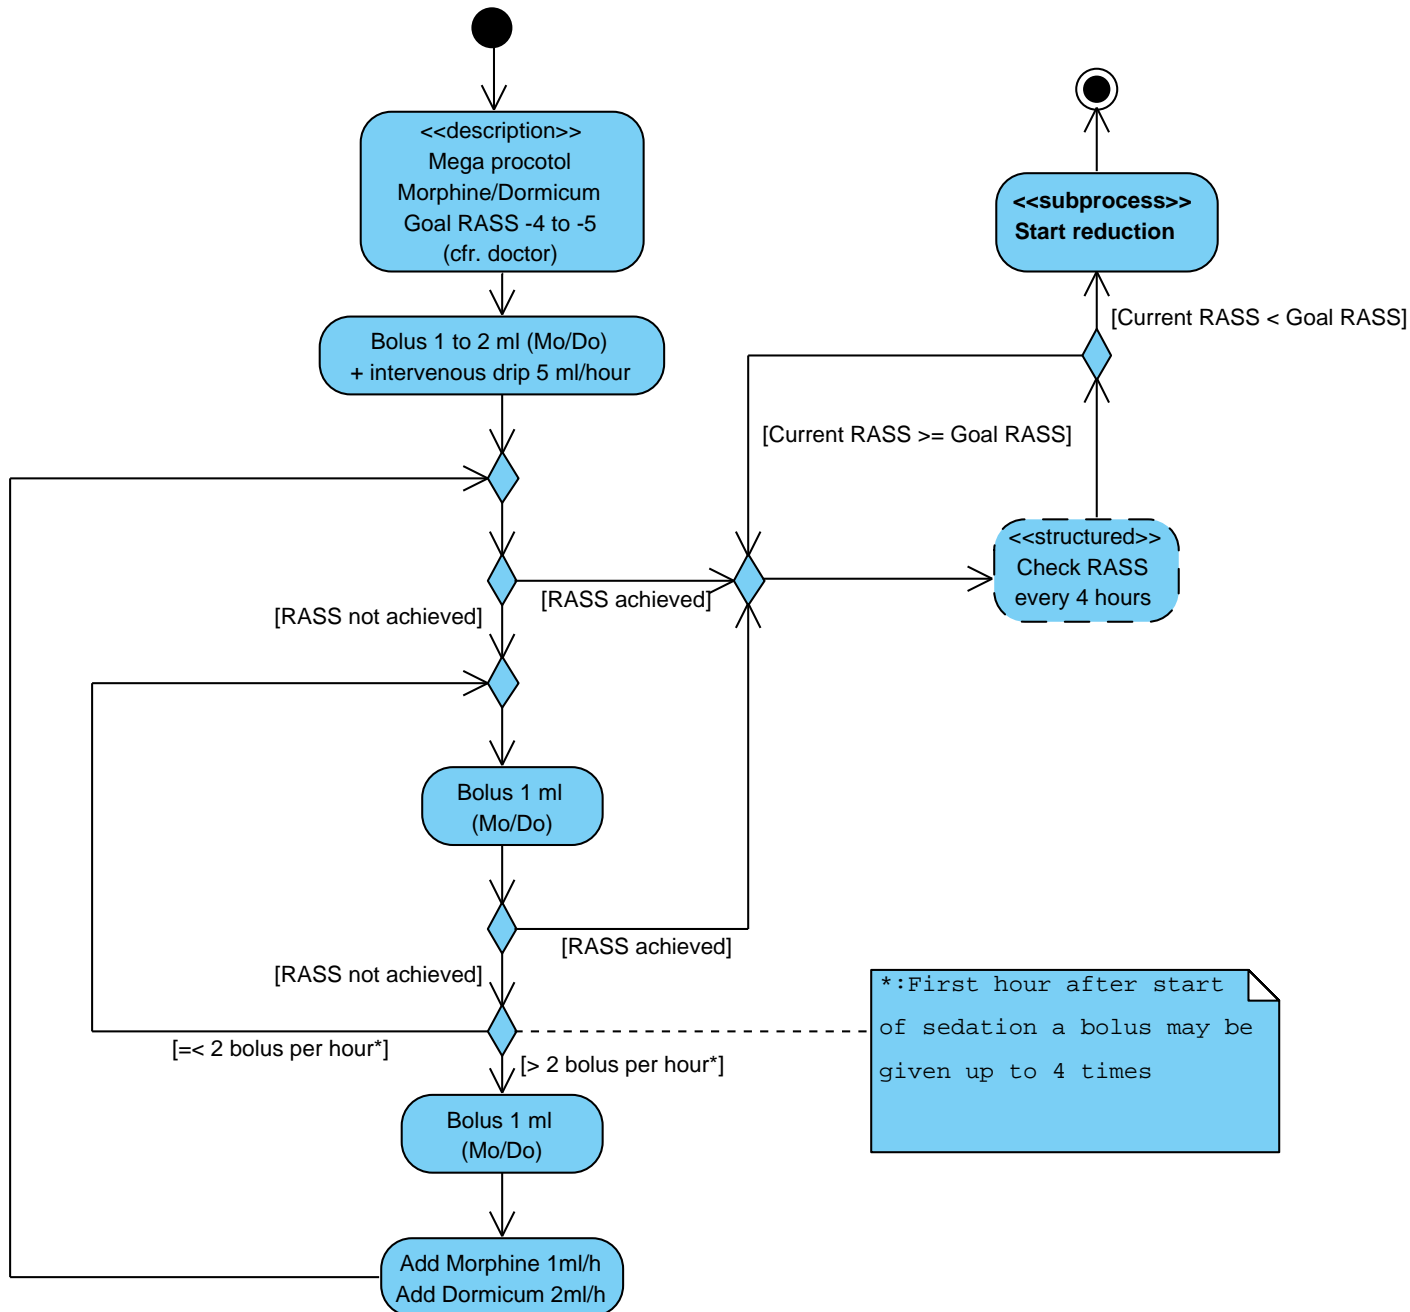

Supplement: MOESM3 [file 9525492]

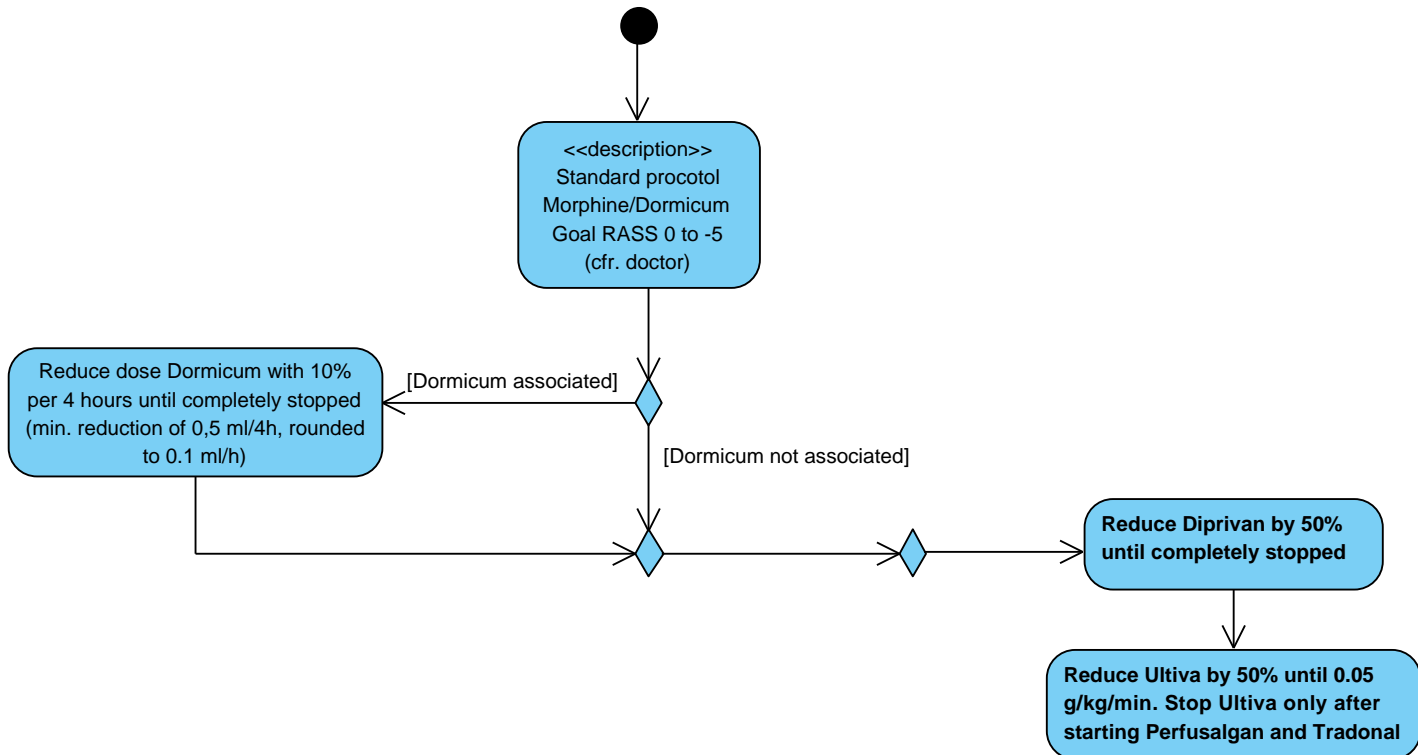

Supplement: MOESM3 [file 9525492]

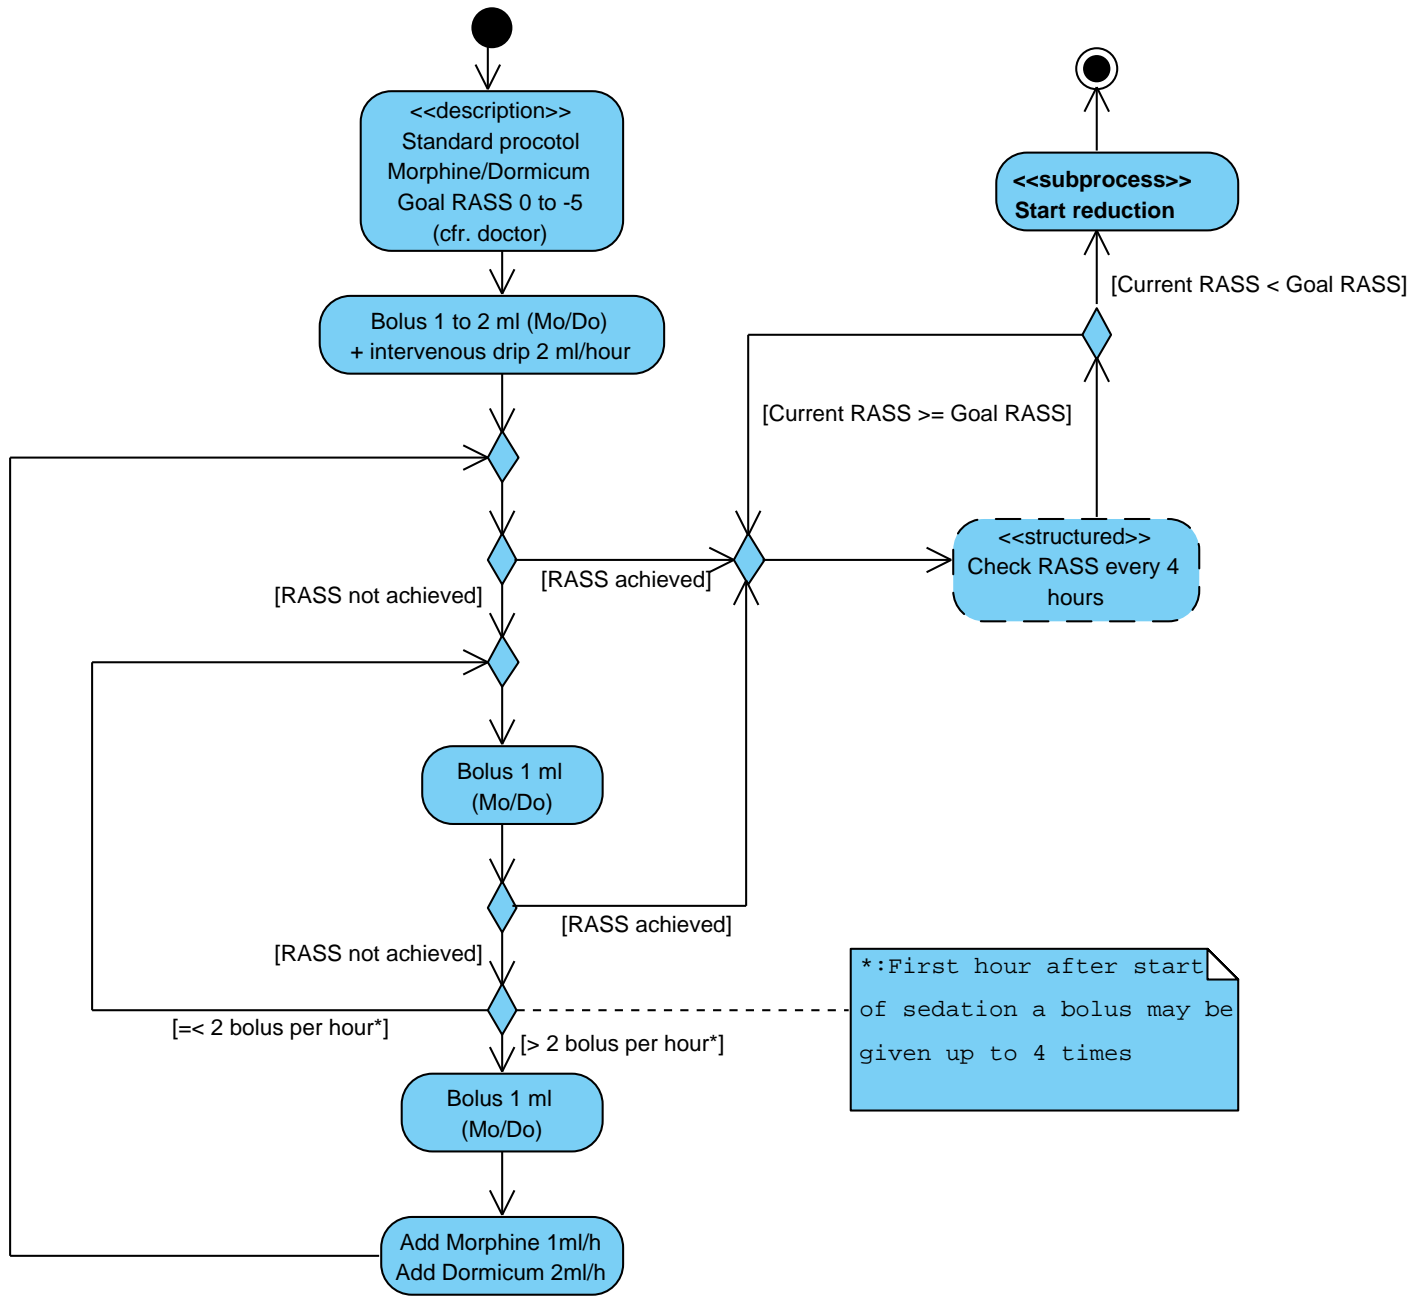

Supplement: MOESM3 [file 9525492]

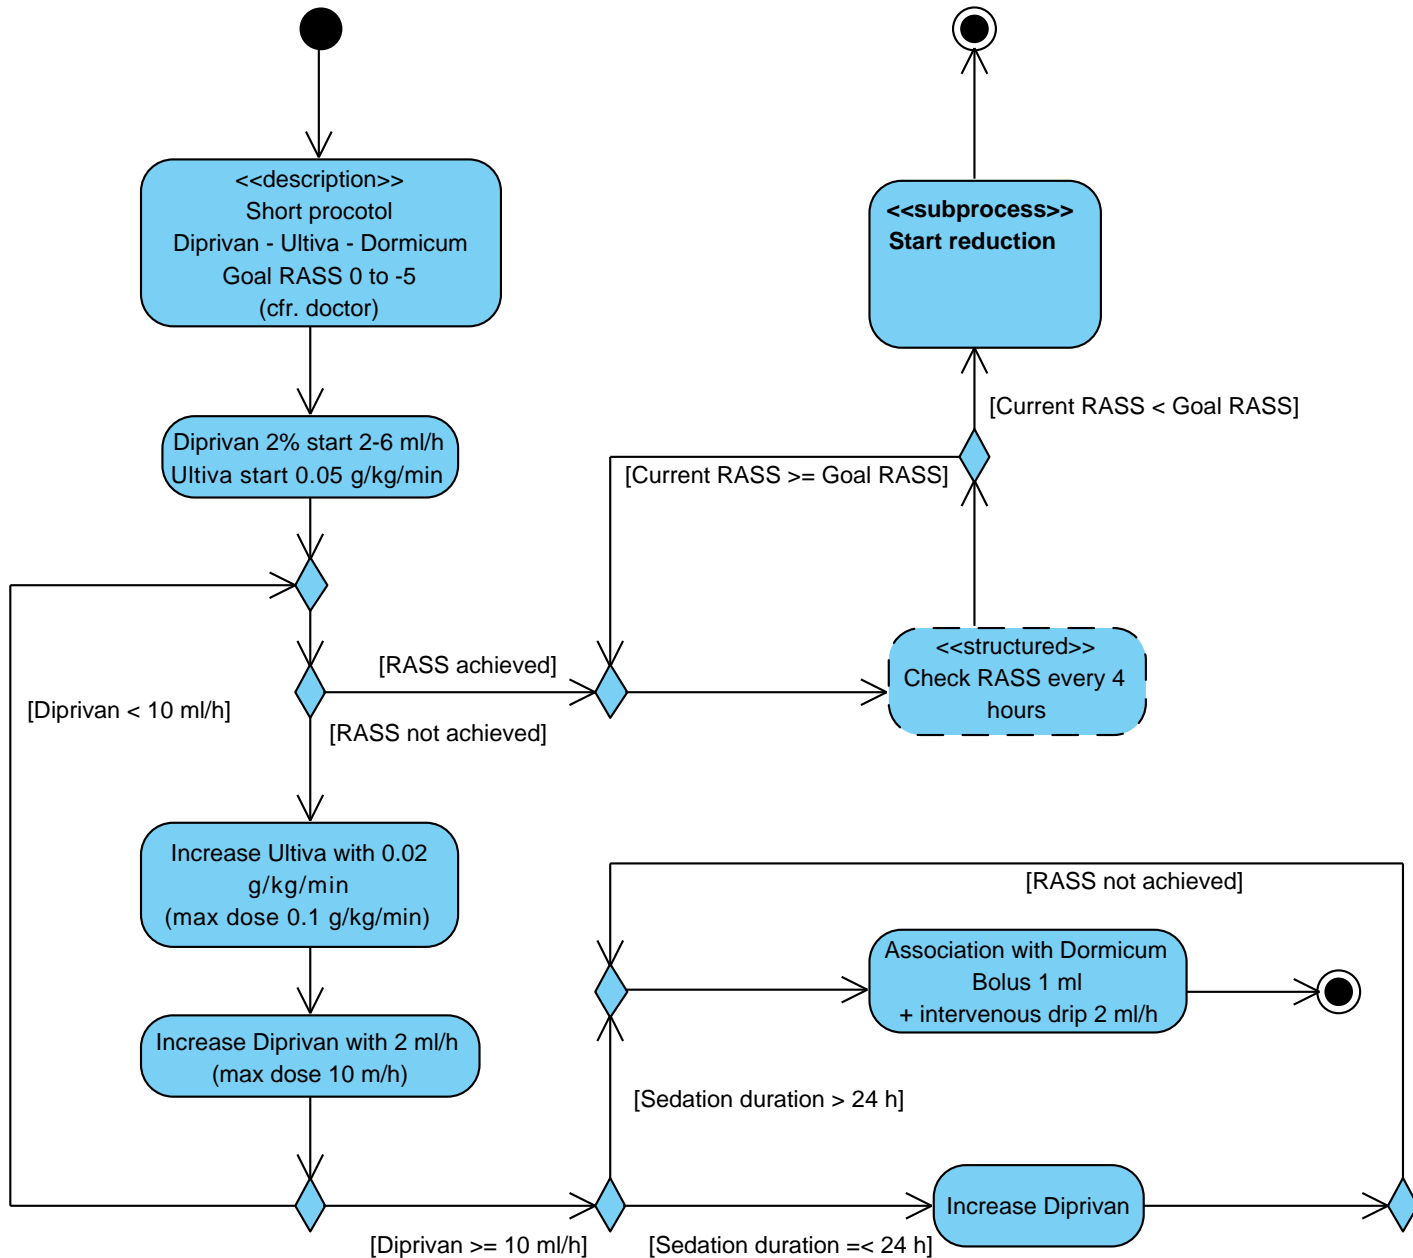

Supplement: MOESM3 [file 9525492]
